# Supplementary material
Source: publisher site journal article supplement (https://www.dovepress.com/article/433467)
Supplement: Supplementary file 1 [file get_supplementary_file.php]

# Supplement Material

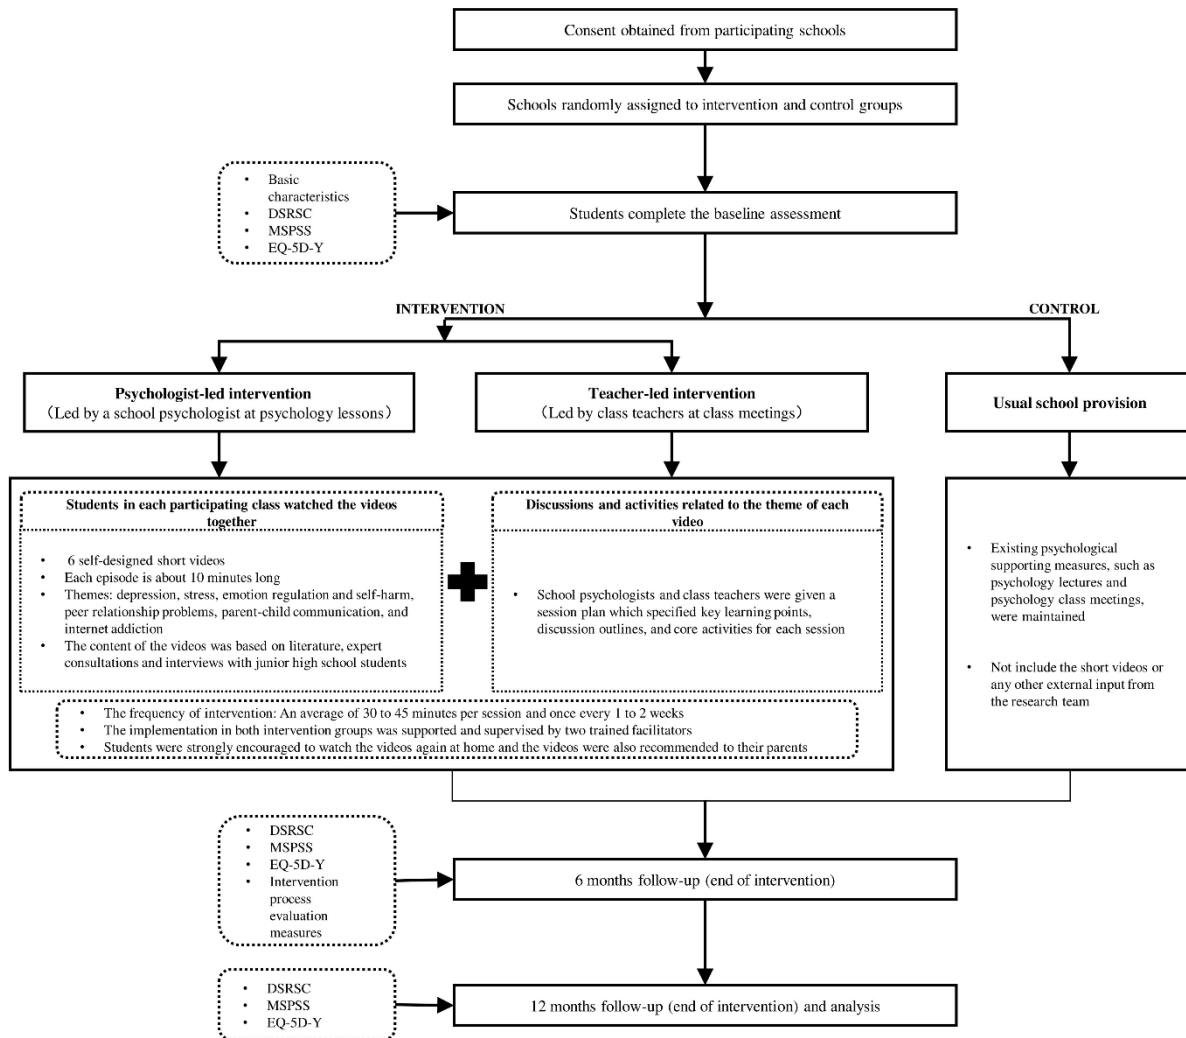

**Supplement Figure 1.** Schematic Illustration of the research design

**Supplement Table 1.** Analysis of the effect of intervention process variables on the primary outcome (DSRSC score at 6-month follow-up)

|                                                               | Psychologist-led intervention |                       |                  | Teacher-led intervention |                       |                  |
|---------------------------------------------------------------|-------------------------------|-----------------------|------------------|--------------------------|-----------------------|------------------|
|                                                               | Mean (SD)/N (%)               | $\beta$ (95%CI)       | p value*         | Mean (SD) /N (%)         | $\beta$ (95%CI)       | p value*         |
| The number of videos watched by students at school            | 5.54 (1.28)                   | 0.07(-0.38 to 0.51)   | 0.769            | 3.76 (2.14)              | -0.40(-0.64 to -0.16) | <b>0.001</b>     |
| The number of videos watched by students at home              | 4.68 (2.22)                   | -0.37(-0.64 to -0.11) | <b>0.006</b>     | 2.79 (2.47)              | -0.52(-0.72 to -0.31) | <b>&lt;0.001</b> |
| The number of videos watched by parents                       | 4.28 (2.45)                   | -0.52(-0.76 to -0.28) | <b>&lt;0.001</b> | 2.53 (2.52)              | -0.55(-0.75 to -0.35) | <b>&lt;0.001</b> |
| Communicated with parents about the videos<br>(Reference: No) | 251 (70.7%)                   | -3.39(-4.66 to -2.12) | <b>&lt;0.001</b> | 160 (44.2%)              | -2.67(-3.72 to -1.61) | <b>&lt;0.001</b> |

Data are mean (SD) or n (%) unless otherwise indicated. Bold text indicates a statistically significant difference with a p-value less than 0.05.

\*Adjusted for baseline DSRSC score, sex, grade, only-child family, household registration, family economic status, study hours per day, and relationships with mother and father
